1 Metabolic proof-reading in *Plasmodium berghei*: essentiality of phosphoglycolate phosphatase

2 **Lakshmeesha Kempaiah Nagappa<sup>1</sup>, Pardhasaradhi Satha<sup>2</sup>, Thimmaiah Govindaraju<sup>2</sup>, Hemalatha**  
3 **Balaram<sup>1</sup>**

4 From the <sup>1</sup>Molecular Biology and Genetics Unit and <sup>2</sup>Bioorganic Chemistry Laboratory, New Chemistry  
5 Unit, Jawaharlal Nehru Centre for Advanced Scientific Research (JNCASR), Bengaluru, Karnataka, INDIA.

6 Running title: *P. berghei phosphoglycolate phosphatase*

7 To whom correspondence should be addressed: Hemalatha Balaram, Molecular Biology and Genetics Unit,  
8 Jawaharlal Nehru Centre for Advanced Scientific Research (JNCASR), Jakkur P.O., Bengaluru, Karnataka,  
9 560064, India. Tel: 91-80-22082812 Fax: 91-80-22082766. E-mail:hb@jncasr.ac.in

10 **Keywords:** *P. berghei*, phosphoglycolate phosphatase, 2-phosphoglycolate, 2-phospho L-lactate, 4-phosphoerythronate,  
11 metabolic proof-reading, detoxification

---

12 **ABSTRACT**

13 *Plasmodium falciparum* (Pf)  
14 4-nitrophenylphosphatase was earlier shown to be  
15 involved in vitamin B1 metabolism by Knöckel *et*  
16 *al.*, (Mol. Biochem. Parasitol. 2008, **157**, 241-  
17 243). An independent BLASTp search showed that  
18 the protein had significant homology with phos-  
19 phoglycolate phosphatase from mouse, human and  
20 yeast, and prompted us to re-investigate the bio-  
21 chemical properties of the recombinant *Plasmod-*  
22 *ium* enzyme. Owing to the insoluble nature of  
23 the Pf enzyme, an extended substrate screen and  
24 biochemical characterization was performed on its  
25 *P. berghei* (Pb) homolog that led to the identi-  
26 fication of 2-phosphoglycolate and 2-phospho L-  
27 lactate as the relevant physiological substrates. 2-  
28 phosphoglycolate is known to be generated during  
29 repair of damaged DNA ends whereas, 2-phospho  
30 L-lactate is a product of pyruvate kinase side reac-  
31 tion. These metabolites are potent inhibitors of the  
32 key glycolytic enzymes, triosephosphate isomerase  
33 and phosphofructokinase, and hence clearance of  
34 these toxic metabolites is vital for cell survival and  
35 functioning. Gene knockout studies conducted in  
36 *P. berghei* revealed the essential nature of this con-  
37 served ‘metabolic proof-reading enzyme’.

40 mainly of phosphatases and phosphotransferases,  
41 that are both intracellular and extracellular in na-  
42 ture. These enzymes are characterized by the pres-  
43 ence of a core Rossmannoid-fold and a cap-domain  
44 (1, 2). Studies on HADSF members have focused  
45 on identifying their physiological substrates by  
46 screening a wide range of metabolites that include  
47 sugar phosphates, lipid phosphates, nucleotides as  
48 well as phosphorylated amino acids and co-factors.  
49 This approach has helped understand the physiolog-  
50 ical relevance of these enzymes in various cellular  
51 processes such as cell wall synthesis, catabolic and  
52 anabolic pathways, salvage pathways, signaling  
53 pathways and detoxification (3–13). Apart from  
54 dephosphorylating metabolites, HADSF members  
55 have also been known to dephosphorylate proteins  
56 and such members are characterized by the absence  
57 of the cap domain (1, 2). A large scale study re-  
58 ported by Huang *et al.*, has identified a HADSF  
59 member from *Salmonella enterica* that catalyzes  
60 dephosphorylation of more than 100 phosphory-  
61 lated substrates (5). This extended substrate speci-  
62 ficity is a common observation in HADSF members  
63 and often leads to a confounding situation where  
64 determining the physiological substrate of such  
65 promiscuous enzymes becomes a challenging task.

66 Recent studies have identified and char-  
67 acterised HADSF members from the apicom-  
68 plexan parasite, *Plasmodium* (4, 10, 13–16).  
69 HADSF members from *Plasmodium* have been

---

38 Haloacid dehalogenase superfamily  
39 (HADSF) is a large family of enzymes consisting

70 found to be involved in processes that lead to 115  
71 the development of resistance to the drug fos- 116  
72 midomycin, which inhibits isoprenoid biosynthe- 117  
73 sis (4). Also, these enzymes show considerable 118  
74 activity towards nucleotide monophosphates and 119  
75 phosphorylated co-factors, and generic substrates 120  
76 such as p-nitrophenylphosphate (pNPP) and  $\beta$ - 121  
77 glycerophosphate. A HADSF member that was 122  
78 annotated as 4-nitrophenylphosphatase from *P. fal-* 123  
79 *ciparum* (gene id. PF3D7\_0715000) was charac- 124  
80 terized by Knöckel *et al.*, (2008) and was proposed 125  
81 to be involved in dephosphorylation of thiamine 126  
82 monophosphate, the precursor of the active form 127  
83 of vitamin B1 (thiamine pyrophosphate). *In vitro* 128  
84 assays on the purified recombinant enzyme showed 129  
85 that this protein displayed similar specific activities 130  
86 towards thiamine monophosphate and other sub- 131  
87 strates (ADP, ATP, CTP, G-6-P, F-6-P and PLP) 132  
88 (15). An independent BLASTp search conducted 133  
89 by us revealed that this protein sequence has sig- 134  
90 nificant homology (28-30 %) with phosphoglyco- 135  
91 late phosphatase (PGP) from yeast, human and 136  
92 mouse (Fig. 1). The (His)<sub>6</sub>-tagged recombi- 137  
93 nant *P. falciparum* (Pf) 4-nitrophenylphosphatase 138  
94 when expressed in *Escherichia coli*, was found 139  
95 to be completely insoluble. However, *P.* 140  
96 *berghei* (Pb) 4-nitrophenylphosphatase (gene id. 141  
97 PBANKA\_1421300) (referred to as PbPGP here- 142  
98 onwards) that shares 69.6 % identity (Fig. 1B) 143  
99 with its *Pf* homolog, expressed in the soluble form 144  
100 in *E. coli* and could be purified to homogeneity. 145  
101 Here, we report on the biochemical characteriza- 146  
102 tion and essentiality of PbPGP. An extended sub- 147  
103 strate screen identified 2-phosphoglycolate and 2- 148  
104 phospho L-lactate as relevant physiological sub- 149  
105 strates in addition to the generic substrates pNPP 150  
106 and  $\beta$ -glycerophosphate. Attempts at gene abla- 151  
107 tion showed that PbPGP gene cannot be disrupted 152  
108 in *P. berghei*, despite the loci being non-refractory 153  
109 for genetic recombination. Our studies on PbPGP 154  
110 establish the essential physiological nature and bio- 155  
111 chemical function of this conserved cytosolic en- 156  
112 zyme, and suggest that drugs that specifically in- 157  
113 hibit parasite phosphoglycolate phosphatase can be 158  
114 promising anti-malarial agents. 159

## RESULTS

*Biochemical characterization of recombi-*  
*nant PbPGP* — BLASTp analysis of Pf and Pb PGP  
protein sequences showed 28-30 % sequence ho-  
mology with phosphoglycolate phosphatase, a con-  
served protein, present across eukaryotes from yeast  
to mouse including humans, involved in metabolic  
proof-reading (Fig. 1A). The Pf and Pb protein  
sequences show 69.6 % identity (Fig. 1B).

Upon expression of C-terminal (His)<sub>6</sub>-  
tagged PfPGP in Rosetta DE3 pLysS strain of *E.*  
*coli*, the protein was found to be present completely  
in the insoluble fraction (Fig. S1A). This was un-  
like the strep-tagged PfPGP that was reported to  
be present in small quantities in the soluble frac-  
tion and hence amenable to purification. There-  
fore, we made use of the protein solubility predic-  
tion software PROSOII and found that homologues  
of PfPGP from other Plasmodia were predicted to  
be soluble (Fig. S1B). Hence, the previously un-  
characterized *P. berghei* homolog was chosen for  
further biochemical studies and physiological in-  
vestigations. PbPGP was expressed in the *E. coli*  
strain Rosetta DE3 pLysS and purified to homo-  
geneity by Ni-NTA affinity chromatography (Fig.  
S1C) followed by size-exclusion chromatography  
(Fig. 2A).

PbPGP on analytical gel filtration using  
Sephacryl S-200 column showed a mass of about  
78 kDa, whereas the theoretical mass is 37 kDa,  
indicating that the protein is a dimer (Fig. 2B and  
C). When further analyzed in the presence of 1 M  
NaCl, there was a shift in oligomeric state of the  
protein from dimer, towards monomer suggesting  
that the oligomers are held by electrostatic interac-  
tions (Fig. 2B and C).

A total of 38 compounds were screened  
as possible substrates for PbPGP. Although the  
enzyme displayed very low activity towards nu-  
cleotides and sugar phosphates as reported for Pf-  
PGP by Knöckel *et al.*, (15) a novel observation  
was made as a consequence of our extended sub-  
strate screen. PbPGP showed very high activity  
on 2-phosphoglycolate and 2-phospho L-lactate in  
addition to the generic substrates pNPP and  $\beta$ -  
glycerophosphate (Fig. 2D). It should be noted  
that the enzyme was stereospecific for 2-phospho  
L-lactate and showed no activity on 2-phospho D-

163 lactate.

164 *Kinetic studies on PbPGP—PbPGP* 212  
165 showed maximum activity at pH 7.0 and pre- 213  
166 ferred  $Mg^{2+}$  as co-factor over other divalent cations 214  
167 (Fig. S2A and B). The substrate saturation plots 215  
168 for  $\beta$ -glycerophosphate, 2-phosphoglycolate and 2- 216  
169 phospho L-lactate were hyperbolic and were fit 217  
170 to Michaelis-Menten equation to obtain the ki- 218  
171 netic parameters such as  $K_m$  and  $V_{max}$  (Fig. 2E-G 219  
172 and Table 1). PbPGP has higher  $K_m$  value for 2- 220  
173 phosphoglycolate (3.3 and 11.4 fold) and 2-phospho 221  
174 L-lactate (27.4 and 6.4 fold) when compared with 222  
175 that of murine PGP and yeast Pho13. The  $k_{cat}$  value 223  
176 for PbPGP for 2-phosphoglycolate is 11.4 and 3.9 224  
177 fold higher and for 2-phospho L-lactate is 37 and 225  
178 8.9 fold higher when compared to that of murine 226  
179 and yeast homologs, respectively. The catalytic ef- 227  
180 ficiency ( $k_{cat}/K_m$ ) for 2-phosphoglycolate was 3.5 228  
181 fold higher and 2.9 fold lower when compared with 229  
182 its murine and yeast homologs respectively. With 230  
183 2-phospho L-lactate as substrate, the parasite en- 231  
184 zyme has similar catalytic efficiency as its murine 232  
185 and yeast homologs. 233

186 *Probing the essentiality of PbPGP and lo-* 234  
187 *calization in P. berghei—pJAZZ linear knockout* 235  
188 vector for PbPGP was generated by following the 236  
189 strategy described by Pfander *et al.*, (17). Drug re- 237  
190 sistant parasites were not obtained in the first tran- 238  
191 sfection attempt. In the second attempt, though drug 239  
192 resistant parasites were obtained, genotyping by 240  
193 PCR revealed non-specific integration of the marker 241  
194 cassette. These parasites were positive by PCR 242  
195 for both the PbPGP gene and the hDHFR marker 243  
196 but were negative for specific 5' and 3' integration 244  
197 PCRs (Fig. S3). Since it was not possible to obtain 245  
198 knockout parasites, a conditional knockdown (at the 246  
199 protein level) strategy was employed by tagging the 247  
200 gene for PbPGP with a regulatable fluorescent affi- 248  
201 nity tag (RFA) where stability of the fusion protein 249  
202 is conditional to the binding of the small molecule 250  
203 trimethoprim. The conditional knockdown vector 251  
204 was also generated by following the recombineering 252  
205 strategy and validated by PCR (Fig. 3A-F). Trans- 253  
206 genic parasites were obtained in the first transfection 254  
207 attempt itself and genotyping by PCR showed the 255  
208 presence of a single homogenous population with 256  
209 correct insertion of RFA tag (Fig. 3F). Neverthe- 257  
210 less, it was observed that the reduction in the lev-

211 els of RFA-tagged protein upon removal of TMP, 212  
varied between 30-60 % across experiments and 213  
complete knockdown could not be achieved (Fig. 214  
3G-I).

The transgenic RFA-tagged *P. berghei* par- 215  
asites were employed to determine localization of 216  
PbPGP and upon microscopic observation a cy- 217  
tosolic GFP signal was observed in all the intra- 218  
erythrocytic stages (Fig. 3J).

## 220 DISCUSSION

221 Earlier Knöckel *et al.*, had performed a 222  
TBLASTN search and identified a potential 4- 223  
nitrophenylphosphatase in *P. falciparum*. The au- 224  
thors had proposed a novel role for this HADSF 225  
member and suggested involvement in vitamin B1 226  
homeostasis (15). We found the *P. falciparum* 4- 227  
nitrophenylphosphatase sequence to have homol- 228  
ogy with human, mouse and yeast phosphoglyco- 229  
late phosphatases. An extended substrate speci- 230  
ficity screen of the recombinant *P. berghei* en- 231  
zyme revealed that, indeed this protein is phos- 232  
phoglycolate phosphatase, which is mainly in- 233  
volved in detoxification, having very high activ- 234  
ity on 2-phosphoglycolate and 2-phospho L-lactate 235  
with no activity on thiamine monophosphate. 2- 236  
phosphoglycolate is reported to be formed during 237  
repair of free radical mediated damage of DNA 238  
ends (18) and accumulation of this metabolite in 239  
the cell, leads to inhibition of the key glycolytic 240  
enzyme triosephosphate isomerase (TIM) (Fig. 4). 241  
Studies on phosphoglycolic acid phosphatases from 242  
yeast and mouse have demonstrated that this en- 243  
zyme also performs metabolic proof-reading by ca- 244  
tabolizing the substrates 2-phospho L-lactate and 245  
4-phosphoerythronate which are products of en- 246  
zymatic side reactions. Activity of PbPGP on 247  
4-phosphoerythronate could not be tested due to 248  
non availability of the compound. 2-phospho L- 249  
lactate, generated by phosphorylation of L-lactate 250  
by pyruvate kinase, is known to inhibit phospho- 251  
fructokinase and 4-phosphoerythronate, which is a 252  
product of GAPDH side reaction, is known to in- 253  
hibit 6-phosphogluconate dehydrogenase (Fig. 4) 254  
(19). Due to the detrimental effect of these metabo- 255  
lites, it becomes essential to clear the cell of these 256  
metabolic toxins. This is reflected upon by the 257  
fact that phosphoglycolate phosphatase is an es-

258 sential gene in mouse (20). Also, in *Arabidopsis*, 306  
259 knockout of PGLP1 isoform leads to impaired post- 307  
260 germination development of primary leaves (21). 308

261 *Plasmodium* in its intra-erythrocytic stages 309  
262 experiences very high levels oxidative stress (22) 310  
263 leading to increased ROS production that can dam- 311  
264 age its DNA, the repair of which will result in gener- 312  
265 ation and accumulation of 2-phosphoglycolate. The 313  
266 parasite undergoes lactic acid fermentation and is 314  
267 known to secrete large amounts of lactate into the 315  
268 medium, most of which is L-lactate (93-94 %), in 316  
269 addition to a small proportion of D-lactate (6-7 %) 317  
270 that is known to be produced through the methyl- 318  
271 glyoxal pathway (23). This lactate can accumu- 319  
272 late and be phosphorylated in the cell to give rise 320  
273 to 2-phospholactate. Surprisingly, Dumont *et al.*, 321  
274 show that upon addition of D-lactate to  $\Delta PfpPGP$  322  
275 cells, intracellular levels of 2-phospholactate spike 323  
276 up and growth is retarded. The authors speculate 324  
277 that although L-lactate is the major isomer that is 325  
278 produced in the parasite, it is D-lactate that is phos- 326  
279 phorylated (16) and accumulates in  $\Delta PfpPGP$  cells. 327  
280 Our results on the purified enzyme clearly show 328  
281 that PbPGP acts only on 2-phospho L-lactate and 329  
282 not on 2-phospho D-lactate (Fig. 2D). We fur- 330  
283 ther validated this by performing enzyme assays on 331  
284 1 mM 2-phospho L-lactate in the presence or ab- 332  
285 sence of 2 mM 2-phospho D-lactate. There was no 333  
286 significant change in specific activity clearly show- 334  
287 ing that 2-phospho D-lactate does not bind to the 335  
288 enzyme (Fig. S2C). This observation is consistent 336  
289 with that of the murine homolog of PbPGP that 337  
290 also acts only on 2-phospho L-lactate (19). It has 338  
291 to be noted that recombinant human pyruvate ki- 339  
292 nase M2 isoform has been shown to phosphorylate 340  
293 L-lactate leading to the production of 2-phospho 341  
294 L-lactate. Also, 2-phospho L-lactate was shown 342  
295 to inhibit phosphofructokinase-2 activity in crude 343  
296 lysates of HCT116 cells and activity of recom- 344  
297 binant phosphofructokinase-fructose 1,6 bisphos- 345  
298 phatase (PFKFB) isozymes, PFKFB3 and PFKFB4 346  
299 (19). 347

300 In *Plasmodium*, where glycolysis is the sole 347  
301 source of ATP in asexual stages (24), the parasite 348  
302 cannot afford inhibition of its critical enzymes such 349  
303 as PFK and TIM due to accumulation of toxic 350  
304 metabolites. Hence, having a metabolic proof- 351  
305 reading/detoxifying enzyme becomes vital for its 352

survival. Inability to obtain knockout parasites in- 306  
307 dicates essentiality of this protein for parasite sur- 308  
309 vival during asexual stages. To rule out the possi- 310  
311 bility of the loci being refractory for genetic re- 312  
313 combination regulatable fluorescent affinity (RFA) 314  
315 tagging was attempted and a homogenous popula- 316  
317 tion of transfectants with RFA-tag integrated at the 318  
319 right loci was obtained. Having established that the 320  
321 loci is amenable for genetic manipulation, condi- 322  
323 tional knockout strategy at protein level making 324  
325 use of the RFA tag (25) was adopted. Conditional 326  
327 knockdown at the protein level showed only 30-60 328  
329 % reduction and hence parasites were viable. Simi- 330  
331 lar observation has been described for yoelipain 332  
333 where the authors were neither able to knockout nor 334  
335 achieve significant knockdown of protein levels to 336  
337 see growth difference. Therefore, it was concluded 338  
339 that the gene was essential during intra-erythrocytic 340  
341 stages (26). Our results are similar and indicate es- 342  
343 sentiality of PbPGP in asexual stages. This conclu- 344  
345 sion on the gene essentiality of PbPGP is in agree- 346  
347 ment with the findings of Dumont *et al.*, on PfpPGP 348  
349 where,  $\Delta pfp$  parasites show growth defect (16). 350  
351 Further biochemical and structural studies on PGP 352  
could pave way for rational design of inhibitors with 353  
potent anti-malarial activity.

## MATERIALS

All chemicals, molecular biology reagents, 354  
355 and media components were from Sigma Aldrich, 356  
357 New England Biolabs, Gibco, Invitrogen and US 358  
359 biochemicals, USA; SRL, Spectrochem and Hi- 360  
361 media, India. *E. coli* strain XL-1 blue, expres- 362  
363 sion strain Rosetta (DE3) pLysS, and plasmids 364  
365 pET22b, and pET23d were from Novagen. The 366  
367 pJAZZ library clone (PbG02\_B-53b06), plasmids 368  
369 pSC101BAD, R6K Zeo/pheS, and GW\_R6K\_GFP- 370  
371 mut3, and *E. coli* pir strains were procured from 372  
373 Plasmogem, Sanger Institute, UK. *E. coli* TSA 374  
375 cells were from Lucigen. Plasmid pGDB was a 376  
377 kind gift from Dr. Vasant Muralidharan, University 378  
379 of Georgia, USA. The *P. falciparum* 3D7 strain and 380  
381 *P. berghei* ANKA strain were procured from MR4. 382  
383 Amaxa 4D nucleofector and P5 Nucleofection kit 384  
385 were from Lonza, Germany. Gene sequencing of 386  
387 the various plasmid constructs was by Sanger se- 388  
389 quencing method. Sequences of oligonucleotides 390  
391 used are provided in the section ‘Supplementary 392

353 information' (Table S1).

## 354 EXPERIMENTAL PROCEDURES

355 *Bio-informatic analysis*—PfPGP (Plas- 400  
356 moDB gene ID PF3D7\_0715000) protein sequence 401  
357 obtained from PlasmoDB database was subjected 402  
358 to homology search against the non-redundant 403  
359 database at NCBI using the BLASTp algorithm. 404  
360 Clustal Omega (27) was used to generate multiple 405  
361 sequence alignment. ProsoII (28) was employed 406  
362 to predict solubility of proteins upon heterologous 407  
363 expression in *E. coli* system. 408

364 *Cloning expression and purification of Pf-* 412  
365 *PGP and PbPGP*—PfPGP and PbPGP were cloned 413  
366 in pET23d and pET22b respectively and expressed 414  
367 in Rosetta DE3 pLysS strain of *E. coli*. The methods 415  
368 are described in detail in 'Supplementary informa- 416  
369 tion'. 417

370 *Determination of oligomeric state*— 418  
371 Oligomeric state of PbPGP was determined by 419  
372 analytical size-exclusion chromatography using 420  
373 Sephacryl S-200 (1 cm x 30 cm) column attached 421  
374 to an AKTA Basic HPLC system. The column 422  
375 was equilibrated using 100 mM Tris HCl, pH 7.4 423  
376 and 100 mM KCl at 0.8 mL min<sup>-1</sup> flow rate and 424  
377 calibrated using the molecular weight standards; 425  
378  $\beta$ -amylase (200 kDa), alcohol dehydrogenase (150 426  
379 kDa), bovine serum albumin (66 kDa), carbonic 427  
380 anhydrase (29 kDa) and cytochrome C (12.4 kDa). 428  
381 100  $\mu$ L of PbPGP at 1 mg mL<sup>-1</sup> concentration was 429  
382 injected into the column and eluted with equilibra- 430  
383 tion buffer with monitoring at 280 nm. The molec- 431  
384 ular mass of PbPGP was estimated by interpolating 432  
385 the elution volume on a plot of logarithm of molec- 433  
386 ular weight standards on the Y-axis and elution vol- 434  
387 ume on the X-axis. Gel-filtration was performed 435  
388 with and without NaCl in the equilibration buffer. 436

389 *Synthesis of 2-phospholactate*—Synthesis 437  
390 of both D and L phospholactate was carried out fol- 438  
391 lowing available procedure (19). The details of the 439  
392 protocol and characterization of the molecules are 440  
393 provided in 'Supplementary information'. 441

394 *Enzyme assays*—A comprehensive sub- 442  
395 strate screen comprising of various classes of 443  
396 molecules such as, nucleoside phosphates, sugar 444  
397 phosphates, co-enzymes, amino acid phosphates, 445  
398 etc. was performed. The assay was carried out in 446  
399 100 mM Tris HCl, pH 7.4, 2 mM substrate, 1 mM 447

400 MgCl<sub>2</sub> in a volume of 100  $\mu$ L. The reaction mix  
401 was pre-incubated at 37 °C for 1 minute, the assay  
402 was initiated using 2  $\mu$ g enzyme and the reaction  
403 was allowed to proceed at 37 °C for 5 minutes. The  
404 reaction was stopped by the addition of 20  $\mu$ L of 70  
405 % trichloroacetic acid (TCA) and 1 mL of freshly  
406 prepared Chen's reagent (water, 6 N sulphuric acid,  
407 2.5 % ammonium molybdate and 10 % L-ascorbic  
408 acid mixed in the ratio 2:1:1:1) was added, mixed  
409 thoroughly and incubated at 37 °C for 1.5 hours.  
410 The color developed was measured against blank  
411 (reaction mix to which enzyme was added after ad-  
412 dition of TCA) at 820 nm. Specific activity was  
413 calculated using the  $\epsilon$  value of 25000 M<sup>-1</sup> cm<sup>-1</sup>.

pH optimum of PbPGP was determined by  
414 performing the assay in a mixed buffer containing  
415 50 mM each of glycine, MES, Tris at different pH,  
416 1 mM MgCl<sub>2</sub> and 1 mM pNPP as substrate in 100  
417  $\mu$ L volume. The reaction mix was pre-incubated at  
418 37 °C for 1 minute and the assay was initiated using  
419 0.2  $\mu$ g enzyme and the reaction was allowed to pro-  
420 ceed at 37 °C for 2 minutes, stopped using TCA and  
421 processed using Chen's reagent as described above.  
422

Preferred divalent metal ion was identified  
423 by using 10 mM pNPP as substrate and different  
424 salts such as MgCl<sub>2</sub>, MnCl<sub>2</sub>, CaCl<sub>2</sub>, CuCl<sub>2</sub>, and  
425 CoCl<sub>2</sub> at a final concentration of 1 mM in a 250  
426  $\mu$ L reaction mix containing 50 mM Tris HCl, pH  
427 8. The reaction was initiated with 0.26  $\mu$ g of en-  
428 zyme and conversion of pNPP to p-nitrophenol was  
429 continuously monitored at 405 nm at 37 °C temper-  
430 ature. Slope of the initial 20 seconds of the progress  
431 curve was used to calculate specific activity using  
432 an  $\epsilon$  value of 18000 M<sup>-1</sup> cm<sup>-1</sup>. 433

434 *Kinetic studies*— $K_m$  values for 2-  
435 phosphoglycolate, 2-phospho L-lactate and  $\beta$ -  
436 glycerophosphate was determined by measuring  
437 initial velocity at varying substrate concentra-  
438 tions ranging from 0.5 mM to 15 mM for 2-  
439 phosphoglycolate and 2-phospho L-lactate and 0.25  
440 mM to 30 mM for  $\beta$ -glycerophosphate. The con-  
441 centration of MgCl<sub>2</sub> was fixed at 5 mM with the  
442 reaction buffer being 200 mM Tricine-NaOH, pH  
443 7.4. The reaction in a volume of 100  $\mu$ L was ini-  
444 tiated with 1.89  $\mu$ g of enzyme, allowed to proceed  
445 at 37 °C for 2 minutes, stopped using TCA and  
446 processed using Chen's reagent as described above.  
447 Specific activity was plotted as a function of sub-

448 strate concentration and the data points were fitted 480  
449 to the Michaelis-Menten equation using GraphPad 481  
450 prism V5 to determine the kinetic parameters (29). 482

451 *Generation of P. berghei transfection vec-*  
452 *tors*—The library clone for *P. berghei* PGP 483  
453 (PbG02\_B-53b06) was obtained from Plasmogem. 484  
454 The procedure for knockout and tagging construct 485  
455 generation was as described earlier (17, 30) and is 486  
456 provided in detail in ‘Supplementary information’. 487

457 *Cultivation and transfection of P.*  
458 *berghei*—Male/female BALB/c mice aged 6-8 488  
459 weeks were used for cultivation and transfection of 489  
460 *P. berghei*. Glycerol stock of wild type *P. berghei* 490  
461 ANKA parasites was injected into a healthy male 491  
462 BALB/c mouse. The parasitemia was monitored by 492  
463 microscopic observation of Giemsa stained smears 493  
464 of blood drawn from tail snip. Transfection of 494  
465 the parasites was done by following the protocol 495  
466 described by Janse *et al.*, (31), using Amaxa 4D 496  
467 nucleofector (P5 solution and FP167 programme) 497  
468 followed by injection into 2 mice. For PbPGP 498  
469 knockout, drug resistant parasites were selected 499  
470 for by feeding infected mice with pyrimethamine in 500  
471 drinking water (7 mg in 100 mL), whereas parasites 501  
472 with PbPGP RFA-tag were selected for by feeding 502  
473 infected mice with trimethoprim in drinking water 503  
474 (30 mg in 100 mL). Drug resistant parasites were 504  
475 harvested in heparin solution (200 units mL<sup>-1</sup>) 505  
476 made in RPMI-1640. Glycerol stocks were made 506  
477 by mixing 300  $\mu$ L of 30 % glycerol and 200  $\mu$ L of 507  
478 the harvested blood and stored in liquid nitrogen. 508  
479 Validation of the drug resistant parasites was done 509  
510

by PCR.

481 *Conditional knockdown of PbPGP in P.*  
482 *berghei*—Glycerol stock of PbPGP RFA-tagged 483  
484 parasites was injected into a healthy BALB/c 484  
485 mouse. The parasitemia was monitored by mi- 485  
486 croscopic observation of Giemsa stained smears of 486  
487 blood drawn from tail snip. Trimethoprim pres- 487  
488 sure was maintained throughout the growth period. 488  
489 Upon parasitemia reaching 5-10 %, about 500  $\mu$ L 489  
490 of infected blood was collected in 500  $\mu$ L of RPMI- 490  
491 1640 solution containing heparin. A 100  $\mu$ L of this 491  
492 parasite containing suspension was injected into 492  
493 a fresh mouse that was fed with trimethoprim in 493  
494 drinking water and a second 100  $\mu$ L to another 494  
495 mouse that was not fed with trimethoprim. Para- 495  
496 sites were harvested from both mice after 6 days 496  
497 and subjected to Western blotting. The entire ex- 497  
498 periment was repeated twice.

498 *Localization of PGP in P. berghei*— 498  
499 PbPGP RFA-tagged parasites were harvested in 499  
500 heparin solution, centrifuged at 2100  $\times$  g for 5 500  
501 minutes and the supernatant discarded. The cells 501  
502 were resuspended in 1  $\times$  PBS containing Hoeschst 502  
503 33342 (10  $\mu$ g mL<sup>-1</sup>) and incubated at room temper- 503  
504 ature for 15 minutes. Thereafter, the cells were col- 504  
505 lected, washed once with 1  $\times$  PBS, resuspended in 505  
506 70 % glycerol and dispersed on poly L-lysine coated 506  
507 cover slips that were mounted on glass slides, sealed 507  
508 and stored at 4 °C. The slides were observed under 508  
509 oil immersion objective (100  $\times$ ) of Ziess LSM 510  
510 Meta confocal microscope.

511 **Acknowledgments:** This project was funded by; 1) Department of Biotechnology, Ministry of Science and  
512 Technology, Government of India. Grant number: BT/PR11294/BRB/10/1291/2014, BT/PR13760/COE/34/42/2015,  
513 and BT/INF/22/SP27679/2018. 2) Science and Engineering Research Board, Department of Science and  
514 Technology, Government of India. Grant number: EMR/2014/001276 and, 3) Institutional funding from  
515 Jawaharlal Nehru Centre of Advanced Scientific Research, Department of Science and Technology, India.  
516 LKN acknowledges CSIR for junior and senior research fellowships. TG acknowledges Department of Sci-  
517 ence and Technology, Government of India (Grant number: DST/SJF/CSA-02/2015-2016) for funding. PS  
518 acknowledges Science and Engineering Research Board, Department of Science and Technology, Govern-  
519 ment of India for post-doctoral fellowship (Grant number: 2017/000920). The authors thank Mr. Madhav  
520 Nayak for initial help in synthesis of phospholactate, Mrs. Suma for help in confocal microscopy and Dr. R.  
521 G. Prakash for help in animal handling.

522 **Conflict of interest:** The authors declare that they have no conflicts of interest with the contents of this  
523 article.

*P. berghei phosphoglycolate phosphatase*

524 **Author contributions:** HB and LKN conceived the project and designed the experiments. LKN performed  
525 biochemical and physiological characterization. PS synthesized and characterized 2-phospholactate under  
526 the supervision of TG. LKN and HB wrote the manuscript.

527 **Ethics statement:** Animal experiments involving handling of BALB/c mice were performed by adhering  
528 to standard procedures prescribed by the Committee for the Purpose of Control and Supervision of Exper-  
529 iments on Animals (CPCSEA), a statutory body under the Prevention of Cruelty to Animals Act of 1960  
530 and Breeding and Experimentation Rules of 1998, Constitution of India. The current study (project no.  
531 HB006/201/CPCSEA) was approved by Institutional animal ethics committee (IAEC) that comes under the  
532 purview of CPCSEA.

## REFERENCES

1. Allen, K. N. and Dunaway-Mariano, D. (2004) Phosphoryl group transfer: evolution of a catalytic scaffold. *Trends Biochem. Sci.* **29**, 495–503
2. Allen, K. N. and Dunaway-Mariano, D. (2009) Markers of fitness in a successful enzyme superfamily. *Curr. Opin. Struct. Biol.* **19**, 658–665
3. Burroughs, A. M., Allen, K. N., Dunaway-Mariano, D., and Aravind, L. (2006) Evolutionary genomics of the had superfamily: understanding the structural adaptations and catalytic diversity in a superfamily of phosphoesterases and allied enzymes. *J. Mol. Biol.* **361**, 1003–1034
4. Guggisberg, A. M., Park, J., Edwards, R. L., Kelly, M. L., Hodge, D. M., Tolia, N. H., and Odom, A. R. (2014) A sugar phosphatase regulates the methylerythritol phosphate (mep) pathway in malaria parasites. *Nat. Commun.* **5**, 4467
5. Huang, H., Pandya, C., Liu, C., Al-Obaidi, N. F., Wang, M., Zheng, L., Keating, S. T., Aono, M., Love, J. D., Evans, B., et al. (2015) Panoramic view of a superfamily of phosphatases through substrate profiling. *Proc. Natl. Acad. Sci.* **112**, E1974–E1983
6. Kuznetsova, E., Proudfoot, M., Gonzalez, C. F., Brown, G., Omelchenko, M. V., Borozan, I., Carmel, L., Wolf, Y. I., Mori, H., Savchenko, A. V., et al. (2006) Genome-wide analysis of substrate specificities of the *Escherichia coli* haloacid dehalogenase-like phosphatase family. *J. Biol. Chem.* **281**, 36149–36161
7. Kuznetsova, E., Nocek, B., Brown, G., Makarova, K. S., Flick, R., Wolf, Y. I., Khusnutdinova, A., Evdokimova, E., Jin, K., Tan, K., et al. (2015) Functional diversity of haloacid dehalogenase superfamily phosphatases from *Saccharomyces cerevisiae* biochemical, structural, and evolutionary insights. *J. Biol. Chem.* **290**, 18678–18698
8. Proudfoot, M., Kuznetsova, E., Brown, G., Rao, N. N., Kitagawa, M., Mori, H., Savchenko, A., and Yakunin, A. F. (2004) General enzymatic screens identify three new nucleotidases in *Escherichia coli* biochemical characterization of sure, yfbr, and yjgg. *J. Biol. Chem.* **279**, 54687–54694
9. Roberts, A., Lee, S.-Y., McCullagh, E., Silversmith, R. E., and Wemmer, D. E. (2005) Ybiv from *Escherichia coli* k12 is a had phosphatase. *Proteins: Struct. Funct. Bioinforma.* **58**, 790–801
10. Srinivasan, B., Nagappa, L. K., Shukla, A., and Balaram, H. (2015) Prediction of substrate specificity and preliminary kinetic characterization of the hypothetical protein pvx\_123945 from *Plasmodium vivax*. *Exp. Parasitol.* **151**, 56–63
11. Titz, B., Häuser, R., Engelbrecher, A., and Uetz, P. (2007) The *Escherichia coli* protein yjgg is a house-cleaning nucleotidase in vivo. *FEMS Microbiol. Lett.* **270**, 49–57
12. Weiss, B. (2007) Yjgg, a dump phosphatase, is critical for thymine utilization by *Escherichia coli* k-12. *J. Bacteriol.* **189**, 2186–2189
13. Guggisberg, A., Frasse, P., Jezewski, A., Kafai, N., Gandhi, A., Erlinger, S., and Odom, A. J. (2018) Suppression of drug resistance reveals a genetic mechanism of metabolic plasticity in malaria parasites. *MBio* **9**, e01193-18
14. Srinivasan, B. and Balaram, H. (2007) Isn1 nucleotidases and had superfamily protein fold: *in silico* sequence and structure analysis. *In Silico Biol.* **7**, 187–193
15. Knöckel, J., Bergmann, B., Müller, I. B., Rathaur, S., Walter, R. D., and Wrenger, C. (2008) Filling the gap of intracellular dephosphorylation in the *Plasmodium falciparum* vitamin b1 biosynthesis. *Mol. Biochem. Parasitol.* **157**, 241–243
16. Dumont, L., Richardson, M. B., van der Peet, P., Dixon, M. W., Williams, S. J., McConville, M. J., Tilley, L., and Cobbold, S. (2018) The metabolic repair enzyme phosphoglycolate phosphatase regulates central carbon metabolism and fosmidomycin sensitivity in *Plasmodium falciparum*. *BioRxiv*, 415505
17. Pfander, C., Anar, B., Schwach, F., Otto, T. D., Brochet, M., Volkmann, K., Quail, M. A., Pain, A., Rosen, B., Skarnes, W., et al. (2011) A scalable pipeline for highly effective genetic modification of a malaria parasite. *Nat. Methods* **8**, 1078
18. Pellicer, M. T., Nunez, M. F., Aguilar, J., Badia, J., and Baldoma, L. (2003) Role of 2-



*P. berghei* phosphoglycolate phosphatase

- phosphoglycolate phosphatase of *Escherichia coli* in metabolism of the 2-phosphoglycolate formed in DNA repair. *J. Bacteriol.* **185**, 5815–5821
19. Collard, F., Baldin, F., Gerin, I., Bolsée, J., Noël, G., Graff, J., Veiga-da Cunha, M., Stroobant, V., Vertommen, D., Houddane, A., et al. (2016) A conserved phosphatase destroys toxic glycolytic side products in mammals and yeast. *Nat. Chem. Biol.* **12**, 601-607
  20. Segerer, G., Hadamek, K., Zundler, M., Fekete, A., Seifried, A., Mueller, M. J., Koentgen, F., Gessler, M., Jeanclos, E., and Gohla, A. (2016) An essential developmental function for murine phosphoglycolate phosphatase in safeguarding cell proliferation. *Sci. Rep.* **6**, 35160
  21. Schwarte, S. and Bauwe, H. (2007) Identification of the photorespiratory 2-phosphoglycolate phosphatase, *pglp1*, in *Arabidopsis*. *Plant Physiol.* **144**, 1580–1586
  22. Atamna, H. and Ginsburg, H. (1993) Origin of reactive oxygen species in erythrocytes infected with *Plasmodium falciparum*. *Mol. Biochem. Parasitol.* **61**, 231–241
  23. Vander Jagt, D. L., Hunsaker, L. A., Campos, N. M., and Baack, B. R. (1990) D-lactate production in erythrocytes infected with *Plasmodium falciparum*. *Mol. Biochem. Parasitol.* **42**, 277–284
  24. Mehta, M., Sonawat, H. M., and Sharma, S. (2006) Glycolysis in *Plasmodium falciparum* results in modulation of host enzyme activities. *J. Vector Borne Dis.* **43**, 95-103
  25. Muralidharan, V., Oksman, A., Iwamoto, M., Wandless, T. J., and Goldberg, D. E. (2011) Asparagine repeat function in a *Plasmodium falciparum* protein assessed via a regulatable fluorescent affinity tag. *Proc. Natl. Acad. Sci.* **108**, 4411–4416
  26. Pei, Y., Miller, J. L., Lindner, S. E., Vaughan, A. M., Torii, M., and Kappe, S. H. (2013) *Plasmodium yoelii* inhibitor of cysteine proteases is exported to exomembrane structures and interacts with yoelipain-2 during asexual blood-stage development. *Cell. Microbiol.* **15**, 1508–1526
  27. Sievers, F., Wilm, A., Dineen, D., Gibson, T. J., Karplus, K., Li, W., Lopez, R., McWilliam, H., Remmert, M., Söding, J., et al. (2011) Fast, scalable generation of high-quality protein multiple sequence alignments using clustal omega. *Mol. Sys. Biol.* **7**, 539
  28. Smialowski, P., Doose, G., Torkler, P., Kaufmann, S., and Frishman, D. (2012) Proso ii—a new method for protein solubility prediction. *FEBS J.* **279**, 2192–2200
  29. Michaelis, L. and Menten, M. (1913) Die kinetik der invertinwirkung. *Biochem Z* **49**, 333–369.
  30. Godiska, R., Mead, D., Dhodda, V., Wu, C., Hochstein, R., Karsi, A., Usdin, K., Entezam, A., and Ravin, N. (2009) Linear plasmid vector for cloning of repetitive or unstable sequences in *Escherichia coli*. *Nucleic Acids Res.* **38**, e88
  31. Janse, C. J., Ramesar, J., and Waters, A. P. (2006) High-efficiency transfection and drug selection of genetically transformed blood stages of the rodent malaria parasite *Plasmodium berghei*. *Nat. Protocols* **1**, 346

618 **FOOTNOTES**

619 **Abbreviations:** HADSF - Haloacid dehalogenase superfamily, PGP - phosphoglycolate phosphatase, pNPP  
620 - para-nitrophenylphosphate, RFA - regulatable fluorescent affinity

621 **Table 1:** Data represents mean  $\pm$  S.E.M (N=2)

622 #Values taken from Collard et al., 2016

623 \* $V_{\max}$  was calculated using  $k_{\text{cat}}$  values from Collard et al., 2016. Molecular mass values of 34540.68 Da and  
624 34624.58 Da for murine PGP and Pho13, respectively was used in the calculation.

625 **FIGURE LEGENDS**

626 **Figure 1. Multiple sequence alignment of phosphoglycolate phosphatase protein sequences.**

627 (A) Clustal omega alignment of phosphoglycolate phosphatase from *Plasmodium falciparum* (P\_falciparum),  
628 *Plasmodium berghei* (P\_berghei), *Saccharomyces cerevisiae* (S\_cerevisiae), *Mus musculus* (M\_musculus)  
629 and human (H\_sapiens). Residues of the conserved HAD motifs involved in catalysis are indicated by \*. (B)  
630 Percentage identity matrix showing the extent of homology between the sequences.

631 **Figure 2. Purification and biochemical characterization of PbPGP.**

632 (A) SDS-PAGE of PbPGP purified using Ni-NTA affinity followed by size-exclusion chromatography. (B  
633 and C) Determination of oligomeric state of PbPGP. (B) Elution profile of PbPGP in the presence and absence  
634 of 1 M NaCl and (C) molecular mass calibration curve with elution volumes of PbPGP in the absence and  
635 presence of NaCl interpolated. (D) Screen for potential substrates of PbPGP. Mean specific activity values are  
636 provided for each substrate and error bars represent SD (n=2). AMP, adenosine 5' monophosphate; dAMP,  
637 deoxy adenosine 5' monophosphate; 3'AMP, adenosine 3' monophosphate; IMP, inosine 5' monophos-  
638 phate; GMP, guanosine 5' monophosphate; XMP, xanthosine 5' monophosphate; cAMP, 3' 5' cyclic AMP;  
639 UMP, uridine 5' monophosphate; CMP, cytidine 5' monophosphate; TMP, thymidine 5' monophosphate;  
640 GDP, guanosine diphosphate; NADP, nicotinamide adenine dinucleotide phosphate; NAM, nicotinic acid  
641 mononucleotide; NMN, nicotinamide mononucleotide; FMN, flavin mononucleotide; F-1,6-bp, fructose 1,6-  
642 bisphosphate; G-6-P, glucose 6-phosphate; M-6-P, mannose 6-phosphate; G-1-P, glucose 1-phosphate; F-6-P,  
643 fructose 6-phosphate; R-5-P, ribose 5-phosphate; 2,3-BPG, 2,3-bisphosphoglycerate; DHAP, dihydroxyace-  
644 tone phosphate; PEP, phosphoenolpyruvate. (E-G) Substrate concentration vs. specific activity plots fit  
645 to Michaelis–Menten equation for  $\beta$ -glycerophosphate, 2-phospho L-lactate and 2-phosphoglycolate. Sub-  
646 strate titration experiment was conducted in two technical replicates containing two biological replicates  
647 each. Plots from one technical replicate are shown. Each data point represents mean specific activity value  
648 and error bars represent SD (n=2).

649 **Figure 3. Conditional knockdown of PbPGP and localization in *P. berghei*.**

650 (A-D) Schematic representation of PbPGP parental, intermediate and final RFA tagging constructs and  
651 PbPGP loci after integration. Oligonucleotide primers are indicated by vertical bars and expected PCR-  
652 product size is represented by line between specific primer pairs. (E) PCR confirmation of parental,  
653 intermediate and final RFA-tagging construct. (F) Genotyping of the strain for integration of cassette in the  
654 correct loci. Primer pairs used are mentioned on top of the panel. (G) Western blot analysis of cell lysates of  
655 RFA-tagged parasites from mice fed with/without trimethoprim (TMP) (30 mg in 100 mL) for 6 days. The  
656 experiment was performed twice (Exp1 and Exp2) and blot from one experimental replicate is shown. Top  
657 panel is the blot probed with anti-HA antibody and the arrow mark indicates the RFA tagged PbPGP protein.

*P. berghei phosphoglycolate phosphatase*

658 The bottom panel was probed with anti-PfHGPRT antibody. (H) Ratio of the intensity of RFA tagged PbPGP  
659 to the intensity of control HGPRT. (I) Reduction in PbPGP levels upon removal of TMP relative to the levels  
660 in the presence of TMP. Protein levels under '+ TMP' condition was taken as 100 %. (J) Localization of  
661 PbPGP using RFA-tagged parasites grown in '+ TMP' condition. The erythrocyte boundary is indicated by  
662 white dotted line in the merge panel.

663 **Figure 4. Metabolites that are substrates for phosphoglycolate phosphatase (A) and their inhibition**  
664 **of key metabolic pathways (B).**

665 **Table 1. Kinetic parameters for PbPGP and its homologs**



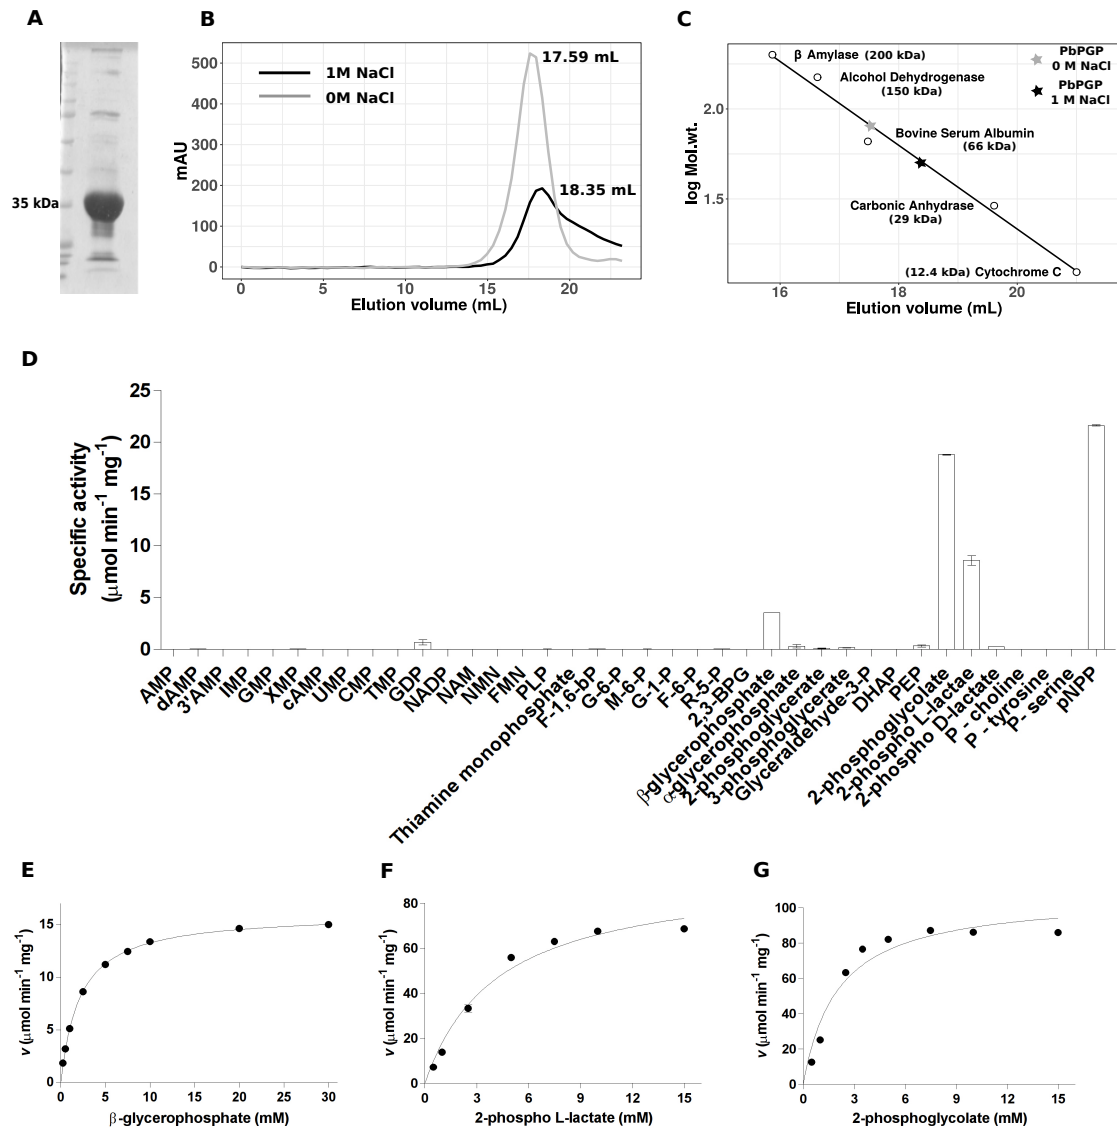

Figure 2: Purification and biochemical characterization of PbPGP.

(A) SDS-PAGE of PbPGP purified using Ni-NTA affinity followed by size-exclusion chromatography. (B and C) Determination of oligomeric state of PbPGP. (B) Elution profile of PbPGP in the presence and absence of 1 M NaCl and (C) molecular mass calibration curve with elution volumes of PbPGP in the absence and presence of NaCl interpolated. (D) Screen for potential substrates of PbPGP. Mean specific activity values are provided for each substrate and error bars represent SD (n=2). AMP, adenosine 5' monophosphate; dAMP, deoxy adenosine 5' monophosphate; 3'AMP, adenosine 3' monophosphate; IMP, inosine 5' monophosphate; GMP, guanosine 5' monophosphate; XMP, xanthosine 5' monophosphate; cAMP, 3' 5' cyclic AMP; UMP, uridine 5' monophosphate; CMP, cytidine 5' monophosphate; TMP, thymidine 5' monophosphate; GDP, guanosine diphosphate; NADP, nicotinamide adenine dinucleotide phosphate; NAM, nicotinic acid mononucleotide; NMN, nicotinamide mononucleotide; FMN, flavin mononucleotide; F-1,6-bp, fructose 1,6-bisphosphate; G-6-P, glucose 6-phosphate; M-6-P, mannose 6-phosphate; G-1-P, glucose 1-phosphate; F-6-P, fructose 6-phosphate; R-5-P, ribose 5-phosphate; 2,3-BPG, 2,3-bisphosphoglycerate; DHAP, dihydroxyacetone phosphate; PEP, phosphoenolpyruvate. (E-G) Substrate concentration vs. specific activity plots fit to Michaelis-Menten equation for  $\beta$ -glycerophosphate, 2-phospho L-lactate and 2-phosphoglycolate. Substrate titration experiment was conducted in two technical replicates containing two biological replicates each. Plots from one technical replicate are shown. Each data point represents mean specific activity value and error bars represent SD (n=2).

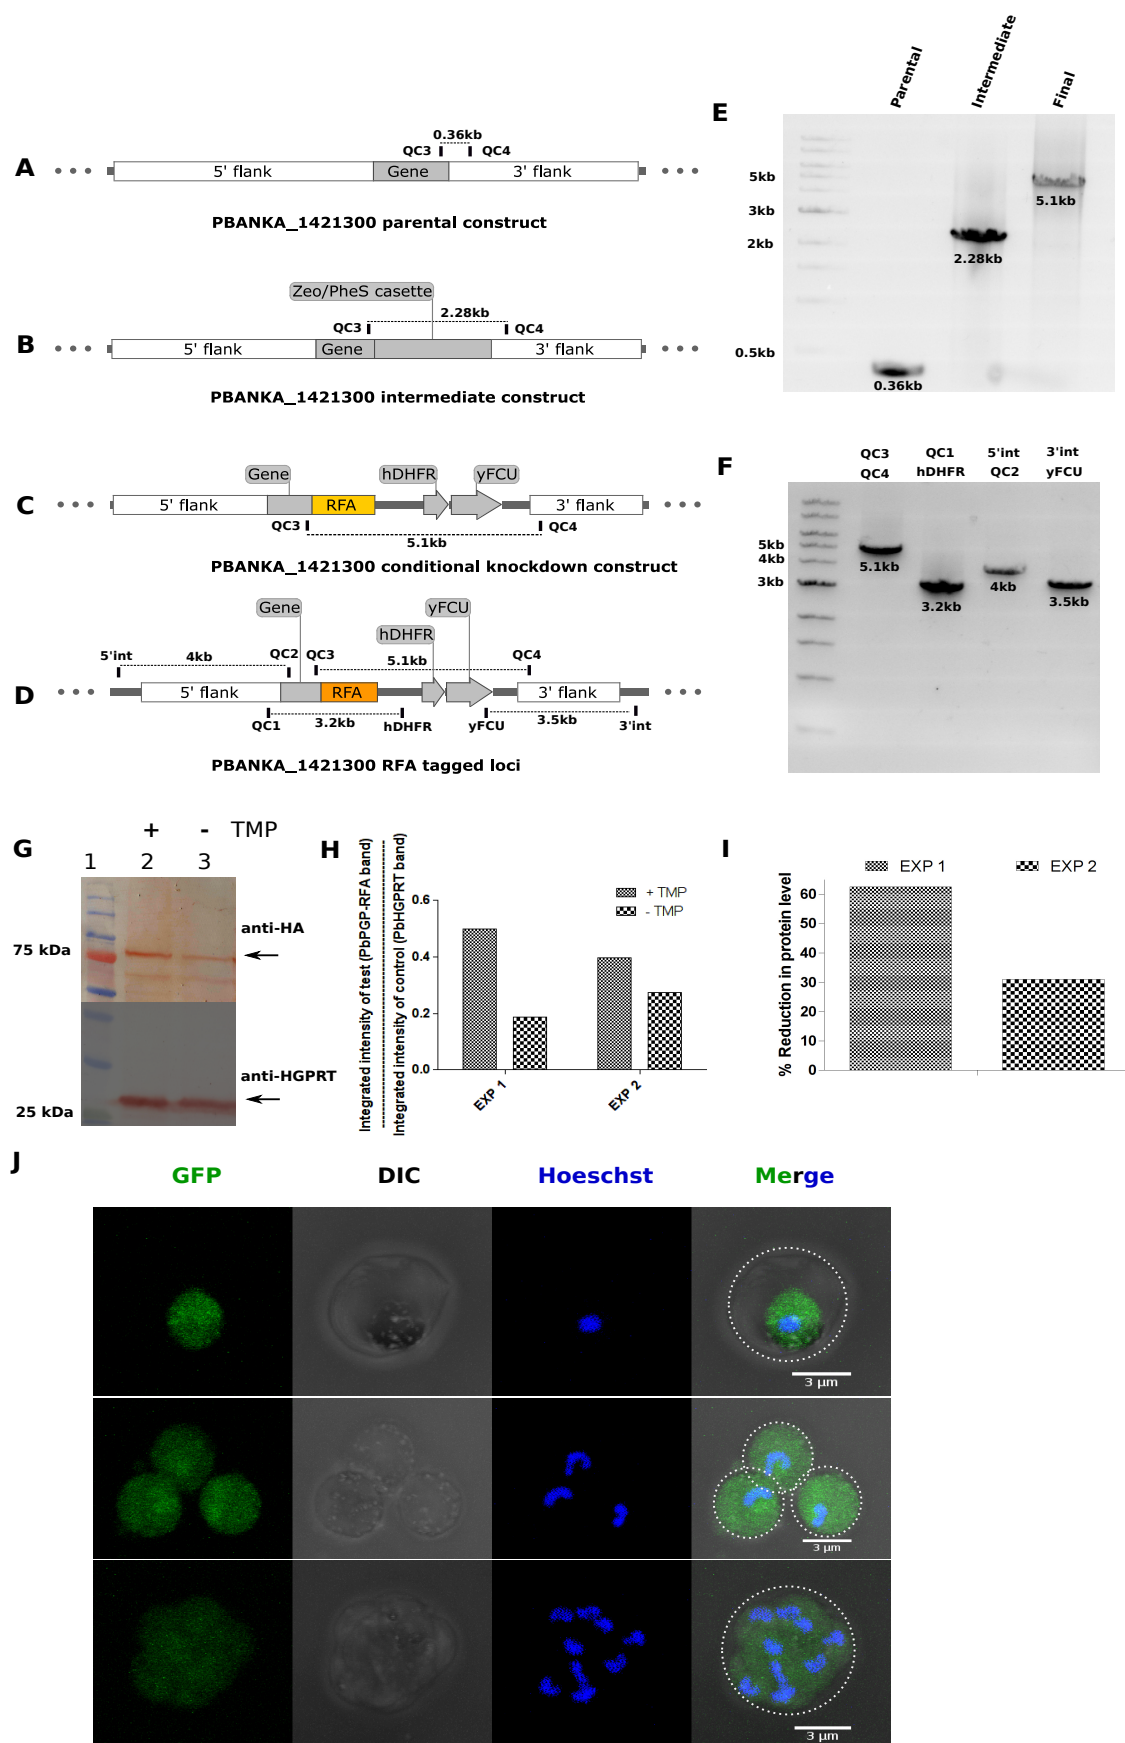

Figure 3: Conditional knockdown of PbPGP and localization in *P. berghei*. (A-D) Schematic representation of PbPGP parental, intermediate and final RFA tagging constructs and PbPGP loci after integration. Oligonucleotide primers are indicated by vertical bars and expected PCR-product size is represented by line between specific primer pairs. (E) PCR confirmation of parental, intermediate and final RFA-tagging construct. (F) Genotyping of the strain for integration of cassette in the correct loci. Primer pairs used are mentioned on top of the panel. (G) Western blot analysis of cell lysates of RFA-tagged parasites from mice fed with/without trimethoprim (TMP) (30 mg in 100 mL) for 6 days. The experiment was performed twice (Exp1 and Exp2) and blot from one experimental replicate is shown. Top panel is the blot probed with anti-HA antibody and the arrow mark indicates the RFA tagged PbPGP protein. The bottom panel was probed with anti-PfHGPRT antibody. (H) Ratio of the intensity of RFA tagged PbPGP to the intensity of control HGPRT. (I) Reduction in PbPGP levels upon removal of TMP relative to the levels in the presence of TMP. Protein levels under '+ TMP' condition was taken as 100 %. (J) Localization of PbPGP using RFA-tagged parasites grown in '+ TMP' condition. The erythrocyte boundary is indicated by white dotted line in the merge panel.

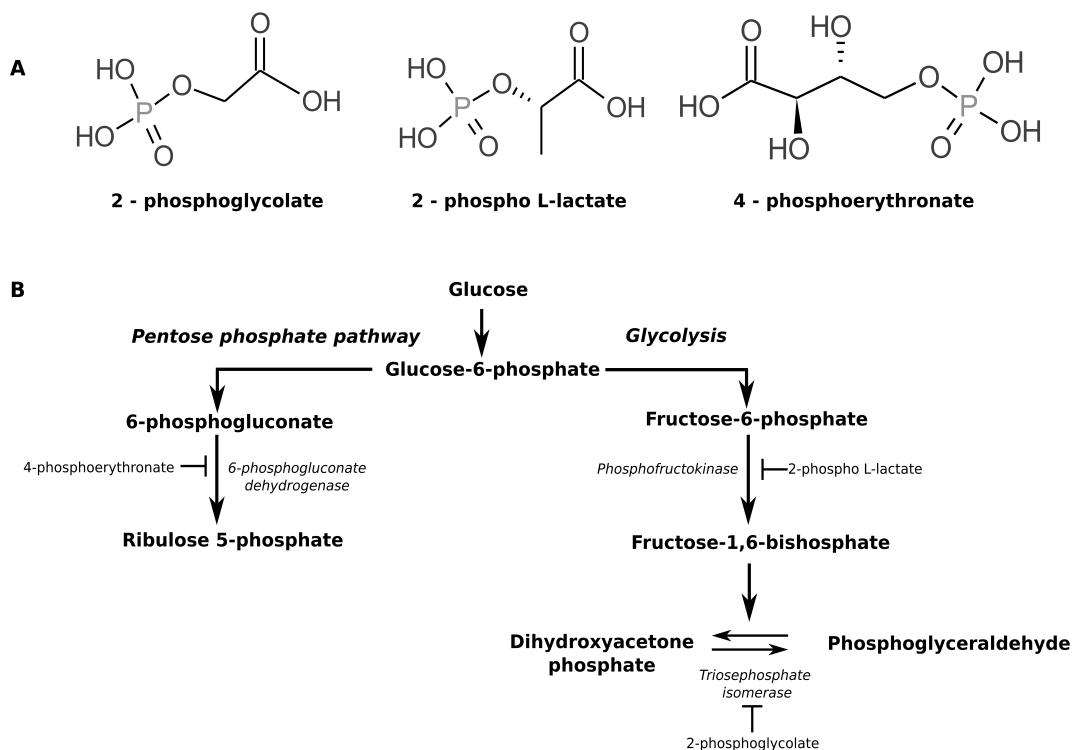

Figure 4: Metabolites that are substrates for phosphoglycolate phosphatase (A) and their inhibition of key metabolic pathways (B).



Table 1: Kinetic parameters of *P. berghei* PGP compared with that of homologs from yeast and mouse.

| Substrate                                                     | Kinetic parameters of PbPGP |                                                        |                                      |                                                        |
|---------------------------------------------------------------|-----------------------------|--------------------------------------------------------|--------------------------------------|--------------------------------------------------------|
|                                                               | $K_m$ ( $\mu\text{M}$ )     | $V_{\max}$ ( $\mu\text{mol min}^{-1} \text{mg}^{-1}$ ) | $k_{\text{cat}}$ ( $\text{s}^{-1}$ ) | $k_{\text{cat}}/K_m$ ( $\text{M}^{-1} \text{s}^{-1}$ ) |
| $\beta$ - glycerophosphate                                    | 2110 $\pm$ 11               | 16.2 $\pm$ 0.14                                        | 10.18 $\pm$ 0.08                     | 4827                                                   |
| 2 - phosphoglycolate                                          | 2526 $\pm$ 494              | 119.5 $\pm$ 12.5                                       | 75.15 $\pm$ 7.86                     | 29747                                                  |
| 2 - phospho L - lactate                                       | 4773 $\pm$ 574              | 107 $\pm$ 13.2                                         | 67.34 $\pm$ 8.31                     | 14108                                                  |
| Kinetic parameters of Murine PGP <sup>#</sup>                 |                             |                                                        |                                      |                                                        |
| 2 - phosphoglycolate                                          | 766 $\pm$ 68                | 11.34 <sup>*</sup>                                     | 6.56 $\pm$ 0.44                      | 8564                                                   |
| 2 - phospho L - lactate                                       | 174 $\pm$ 55                | 3.14 <sup>*</sup>                                      | 1.82 $\pm$ 0.34                      | 10480                                                  |
| Kinetic parameters of <i>S. cerevisiae</i> Pho13 <sup>#</sup> |                             |                                                        |                                      |                                                        |
| 2 - phosphoglycolate                                          | 221 $\pm$ 13                | 32.87 <sup>*</sup>                                     | 19.0 $\pm$ 0.44                      | 85700                                                  |
| 2 - phospho L - lactate                                       | 747 $\pm$ 135               | 13.09 <sup>*</sup>                                     | 7.57 $\pm$ 1.04                      | 10113                                                  |

Data represents mean  $\pm$  S.E.M (N=2)

<sup>#</sup>Values taken from Collard et al., 2016

<sup>\*</sup>  $V_{\max}$  was calculated using  $k_{\text{cat}}$  values from Collard et al., 2016. Molecular mass values of 34540.68 Da and 34624.58 Da for murine PGP and Pho13, respectively was used in the calculation.
